# Supplementary material
Source: HighWire-hosted journal article supplement (https://bmjopen.bmj.com/content/12/3/e053652)
Supplement: inline-supplementary-material-1 [file inline-supplementary-material-1.pdf]

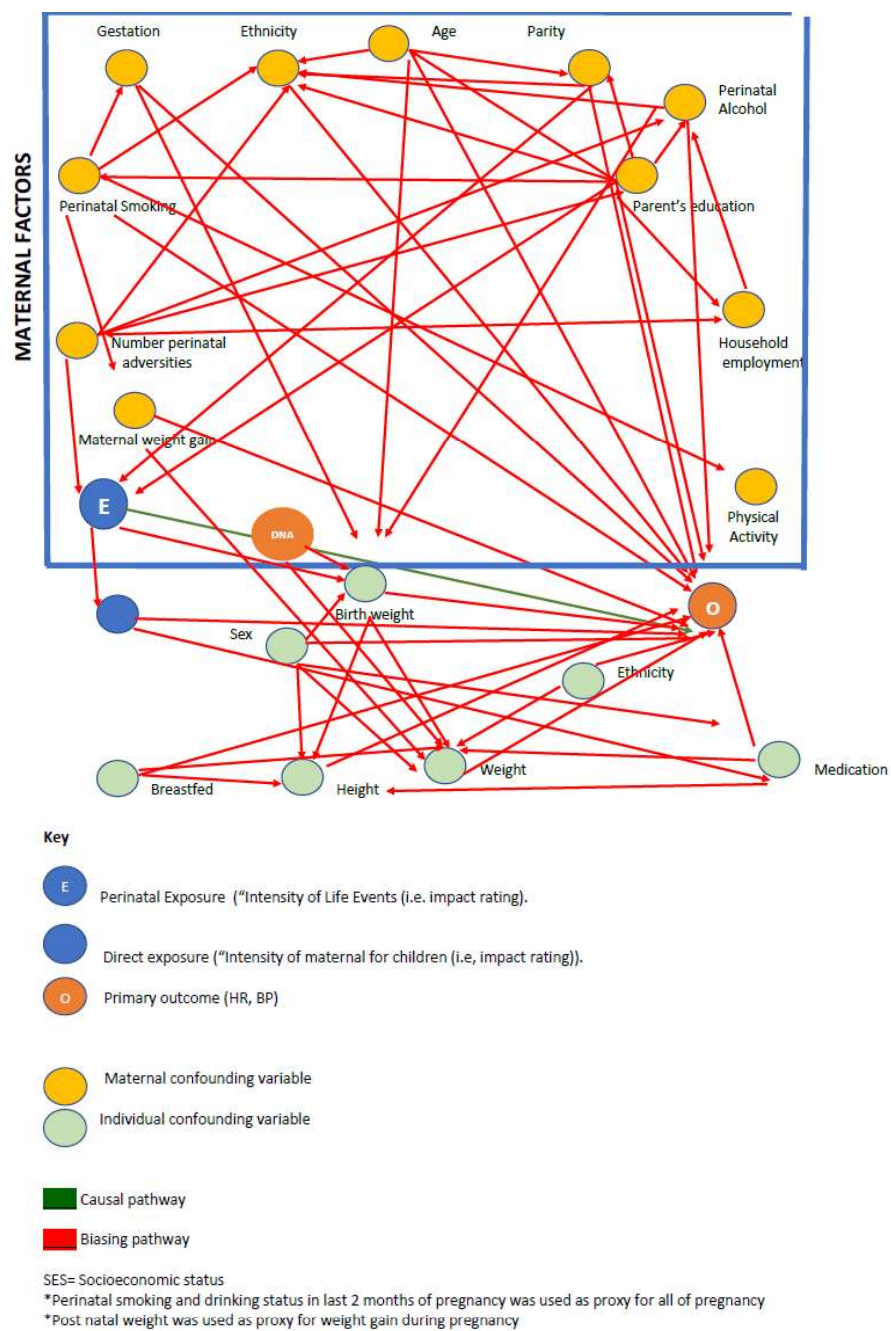

Supplementary Figure S1: Directed Acyclic Graph at 7 years of age
